# Supplementary figures and images for: Continuous Relationship of Operative Duration with Risk of Adverse Perioperative Outcomes and Early Discharge Undergoing Thoracoscopic Lung Cancer Surgery
Source: MDPI journal article supplement (doi:10.3390/cancers15020371), 2023-01-06

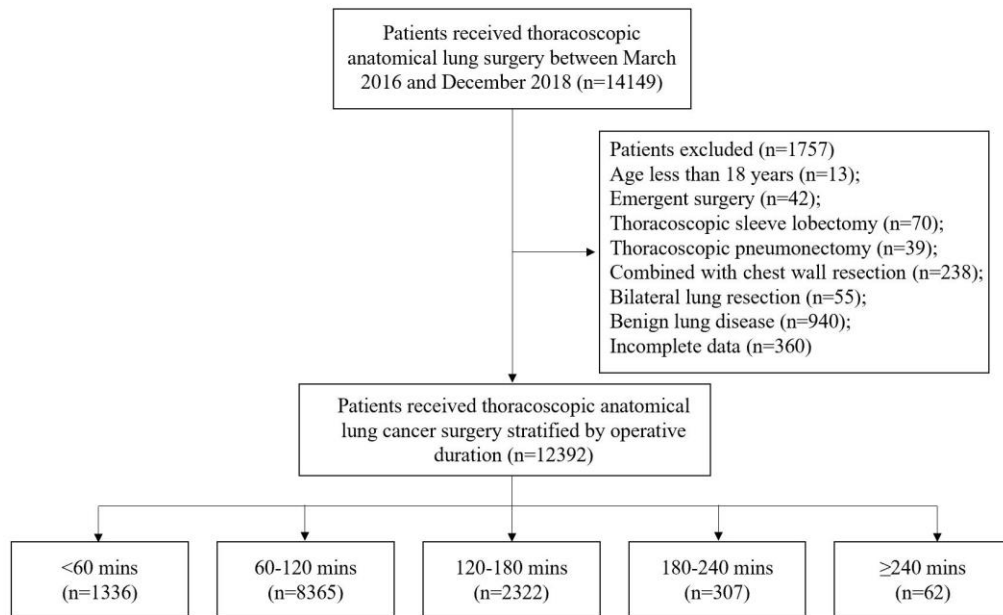

Supplementary Figure S1 Patient flowchart.

Supplement: s1 [file s1]
